# Supplementary material for: Interaction of a conjugated polyaromatic molecule with a single dangling bond quantum dot on a hydrogenated semiconductor
Source: Royal Society of Chemistry journal article supplement (doi:10.1039/c5cp07307c), 2016-01-01
Supplement: c5cp07307c1.pdf [file c5cp07307c1.pdf]

## Supporting Information for

### Interaction of a conjugated polyaromatic molecule with a single dangling bond quantum dot on a hydrogenated semiconductor

Szymon Godlewski, Marek Kolmer, Mads Englund, Hiroyo Kawai, Rafal Zuzak, Aran Garcia-Lekue, Mark Saeys, Antonio M. Echavarren, Christian Joachim, Daniel Sanchez-Portal, Marek Szymonski

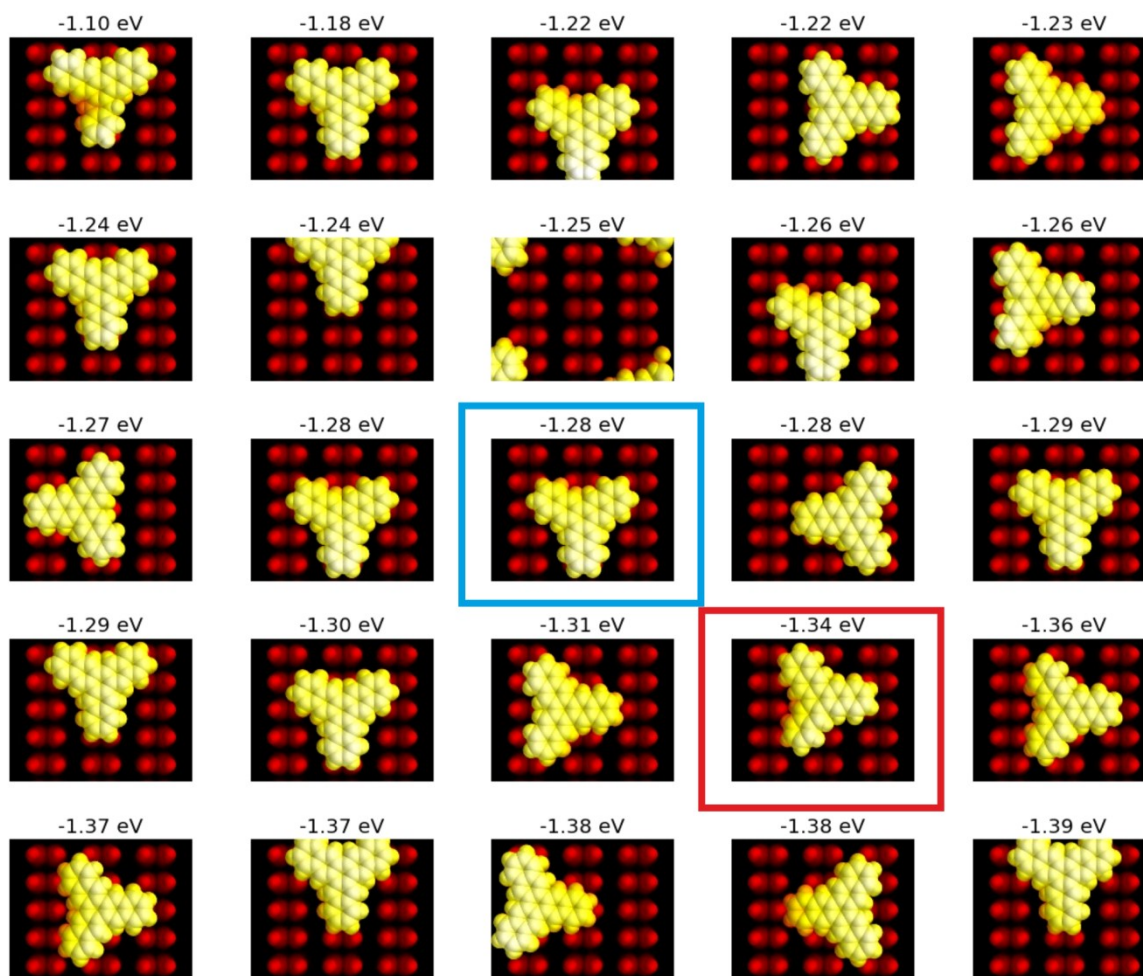

Figure S1. All configurations considered in the study. Atoms are displayed as balls using van der Waals radii of respective elements. The color codes the out of plane altitude from black indicating most deeply located structures up to white coding the parts exhibiting the highest altitude. The structure, in which chemical bond is formed between the molecule and the surface is shown in the upper left-hand side corner. The adsorption energies are displayed above the respective image. The geometries 1 and 2 discussed in the main text of the manuscript are marked with blue and red rectangles, respectively.
